# Supplementary material for: Thrombotic and hemorrhagic events in 2016 World Health Organization-defined Philadelphia- negative myeloproliferative neoplasm
Source: PubMed Central journal article supplement — Korean J Intern Med. 2021 Jul 22;36(5):1190–203. doi: 10.3904/kjim.2020.634 (PMC8435504; doi:10.3904/kjim.2020.634), 2021-07-22
Supplement: kjim-2020-634-suppl1.pdf [file kjim-2020-634-suppl1.pdf]

**Supplementary Table 1. Cox's regression analysis seeking risk factors for thrombosis in essential thrombocythemia (n = 139)**

| Variable                              | Univariate analysis |           |         | Multivariate analysis |           |         |
|---------------------------------------|---------------------|-----------|---------|-----------------------|-----------|---------|
|                                       | HR                  | 95% CI    | p value | HR                    | 95% CI    | p value |
| Age > 60 years                        | 2.53                | 1.27–5.03 | 0.008   | 1.73                  | 0.83–3.62 | 0.141   |
| Male sex                              | 2.04                | 1.08–3.89 | 0.029   | 1.53                  | 0.73–3.22 | 0.262   |
| WBC > 12.0 × 10 <sup>9</sup> /L       | 1.27                | 0.66–2.44 | 0.482   | -                     | -         | -       |
| Platelet > 1,000 × 10 <sup>9</sup> /L | 0.98                | 0.52–1.84 | 0.943   | -                     | -         | -       |
| Positive JAK2V617F                    | 2.09                | 0.86–5.08 | 0.104   | -                     | -         | -       |
| Hypertension                          | 2.60                | 1.41–4.81 | 0.002   | 1.92                  | 0.99–3.74 | 0.56    |
| Diabetes mellitus                     | 0.88                | 0.34–2.23 | 0.783   | -                     | -         | -       |
| Chronic kidney disease                | 3.25                | 1.73–6.12 | 0.001   | 2.29                  | 1.15–4.57 | 0.018   |
| Smoking                               | 2.59                | 1.36–4.94 | 0.004   | 2.40                  | 1.26–4.58 | 0.008   |

HR, hazard ratio; CI, confidence interval; WBC, white blood cell; JAK2, Janus kinase 2.
