# Supplementary material for: Thrombotic and hemorrhagic events in 2016 World Health Organization-defined Philadelphia- negative myeloproliferative neoplasm
Source: PubMed Central journal article supplement — Korean J Intern Med. 2021 Jul 22;36(5):1190–203. doi: 10.3904/kjim.2020.634 (PMC8435504; doi:10.3904/kjim.2020.634), 2021-07-22
Supplement: kjim-2020-634-suppl2.pdf [file kjim-2020-634-suppl2.pdf]

**Supplementary Table 2. Cox's regression analysis seeking for risk factors for thrombosis in prefibrotic/early primary myelofibrosis (n = 42)**

| Variable                              | Univariate analysis |            |         | Multivariate analysis |            |         |
|---------------------------------------|---------------------|------------|---------|-----------------------|------------|---------|
|                                       | HR                  | 95% CI     | p value | HR                    | 95% CI     | p value |
| Age > 60 years                        | 5.54                | 1.25–24.59 | 0.024   | 2.43                  | 0.40–14.66 | 0.332   |
| Male sex                              | 1.56                | 0.57–4.32  | 0.389   | -                     | -          | -       |
| WBC > 12.0 × 10 <sup>9</sup> /L       | 0.83                | 0.31–2.23  | 0.709   | -                     | -          | -       |
| WBC > 20.0 × 10 <sup>9</sup> /L       | 0.55                | 0.07–4.18  | 0.565   | -                     | -          | -       |
| Platelet > 1,000 × 10 <sup>9</sup> /L | 0.17                | 0.04–0.74  | 0.018   | 0.22                  | 0.05–0.99  | 0.049   |
| IPSS intermediate-1                   | 4.68                | 1.61–23.57 | 0.004   | 3.63                  | 1.24–10.66 | 0.019   |
| Positive JAK2V617F                    | 0.85                | 0.31–4.22  | 0.848   | -                     | -          | -       |
| Hypertension                          | 0.99                | 0.61–1.62  | 0.969   | -                     | -          | -       |
| Diabetes mellitus                     | 0.90                | 0.51–1.59  | 0.718   | -                     | -          | -       |
| Chronic kidney disease                | 0.95                | 0.54–1.67  | 0.849   | -                     | -          | -       |
| Smoking                               | 0.85                | 0.50–1.45  | 0.550   | -                     | -          | -       |

HR, hazard ratio; CI, confidence interval; WBC, white blood cell; IPSS, International Prognostic Scoring System; JAK2, Janus kinase 2.
