# Supplementary material for: Thrombotic and hemorrhagic events in 2016 World Health Organization-defined Philadelphia- negative myeloproliferative neoplasm
Source: PubMed Central journal article supplement — Korean J Intern Med. 2021 Jul 22;36(5):1190–203. doi: 10.3904/kjim.2020.634 (PMC8435504; doi:10.3904/kjim.2020.634), 2021-07-22
Supplement: kjim-2020-634-suppl7.pdf [file kjim-2020-634-suppl7.pdf]

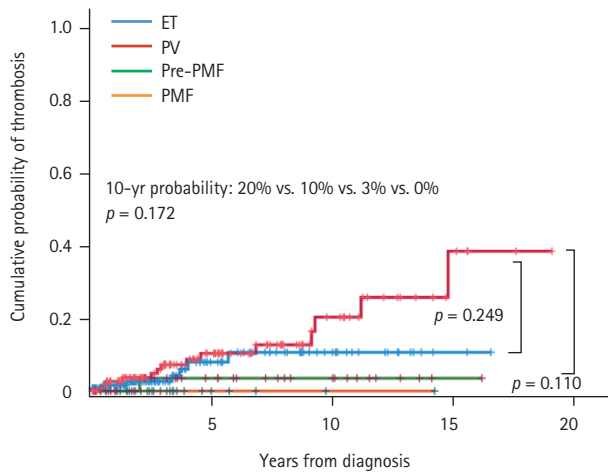

**Supplementary Figure 1.** Cumulative probabilities of thrombosis developing after diagnosis in patients with the various myeloproliferative neoplasm subtypes. ET, essential thrombocythemia; PV, polycythemia vera; pre-PMF, prefibrotic/early primary myelofibrosis; PMF, primary myelofibrosis.
