# Supplementary material for: Thrombotic and hemorrhagic events in 2016 World Health Organization-defined Philadelphia- negative myeloproliferative neoplasm
Source: PubMed Central journal article supplement — Korean J Intern Med. 2021 Jul 22;36(5):1190–203. doi: 10.3904/kjim.2020.634 (PMC8435504; doi:10.3904/kjim.2020.634), 2021-07-22
Supplement: kjim-2020-634-suppl8.pdf [file kjim-2020-634-suppl8.pdf]

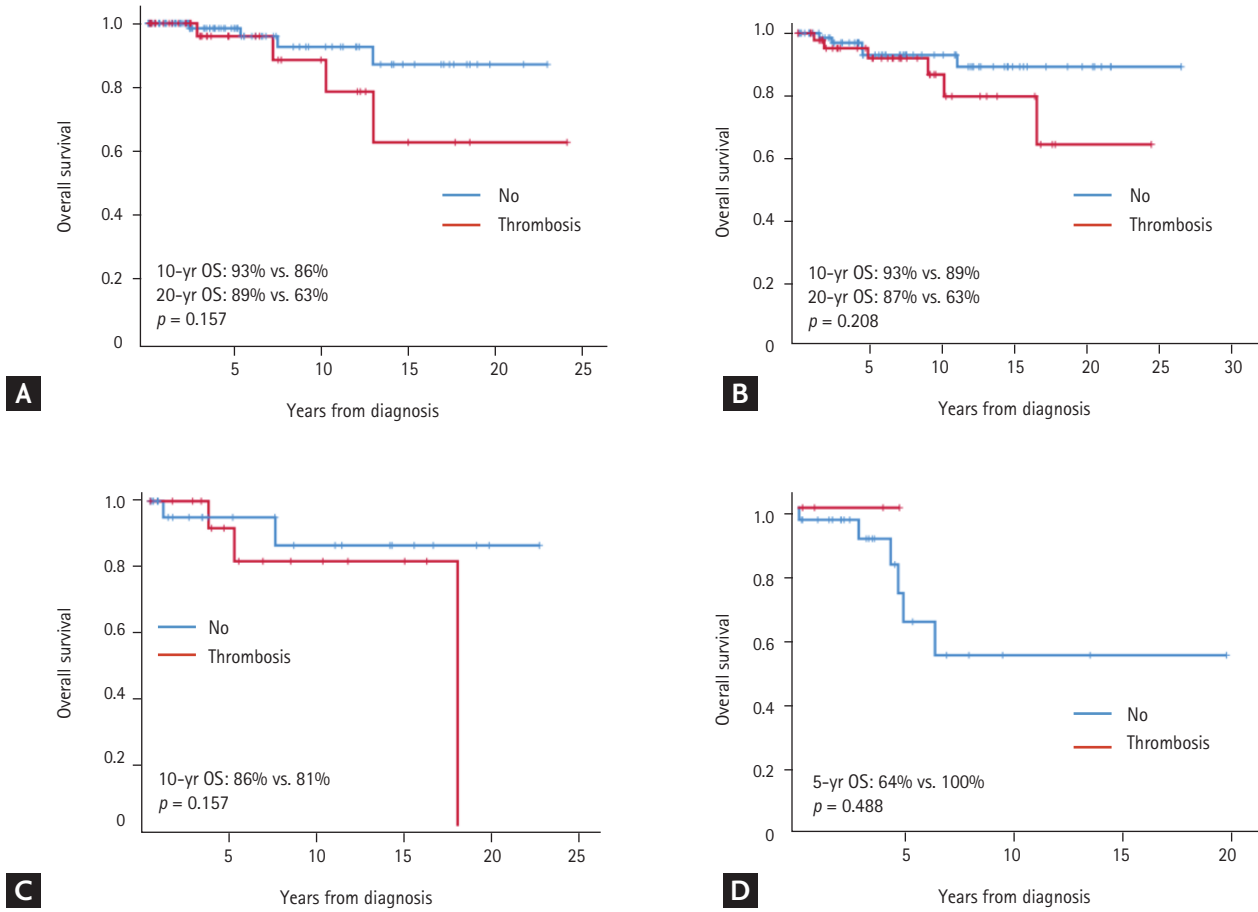

**Supplementary Figure 2.** Overall survival (OS) of patients with myeloproliferative neoplasms with and without thromboses. (A) Essential thrombocythemia patients. (B) Polycythemia vera patients. (C) Prefibrotic/early primary myelofibrosis patients. (D) Primary myelofibrosis patients.
